# Supplementary material for: Hydrodeoxygenation of bio-derived anisole to cyclohexane over bi-functional IM-5 zeolite supported Ni catalysts
Source: Royal Society of Chemistry journal article supplement (doi:10.1039/c9se00554d), 2019-01-01
Supplement: c9se00554d1.pdf [file c9se00554d1.pdf]

Electronic Supplementary information

**Hydrodeoxygenation of bio-derived anisole to cyclohexane  
over bi-functional IM-5 zeolite supported Ni catalysts**

Chunyan Tu<sup>a\*</sup>, Junwen Chen<sup>c</sup>, Wenlin Li<sup>b, d\*</sup>, Hongyan Wang<sup>a</sup>, Kaixi Deng<sup>d</sup>, Vladimir

A. Vinokurov<sup>e</sup>, Wei Huang<sup>a\*</sup>

<sup>a</sup> Key Laboratory of Coal Science and Technology of Ministry of Education and Shanxi Province, Taiyuan University of Technology, Taiyuan 030024, China. Email: [tuchunyan@tyut.edu.cn](mailto:tuchunyan@tyut.edu.cn); [huangwei@tyut.edu.cn](mailto:huangwei@tyut.edu.cn)

<sup>b</sup> College of Chemistry and Chemical Engineering, Taiyuan University of Technology, Taiyuan 030024, China

<sup>c</sup> State Key Laboratory of Catalytic Materials and Reaction Engineering, Research Institute of Petroleum Processing, SINOPEC, Beijing 100083, China

<sup>d</sup> Chemistry Department, Brookhaven National Laboratory, Upton, NY, 11973 USA. E-mail: [wenlin@bnl.gov](mailto:wenlin@bnl.gov)

<sup>e</sup> Department of Physical and Colloid Chemistry, Gubkin Russian State University of Oil and Gas (National Research University), Leninskiy prospect 65/1, Moscow, 119991, Russia

Table S1. Ni concentration of IM-5 supported Ni catalysts.

| Sample    | Ni content, wt % (ICP-MS) | Ni content, wt % (XPS) |
|-----------|---------------------------|------------------------|
| Ni/IM-5   | 5.0                       | 0.8                    |
| Ni/IM-5-h | 4.9                       | 1.0                    |
| Ni/IM-5-m | 5.3                       | 1.2                    |

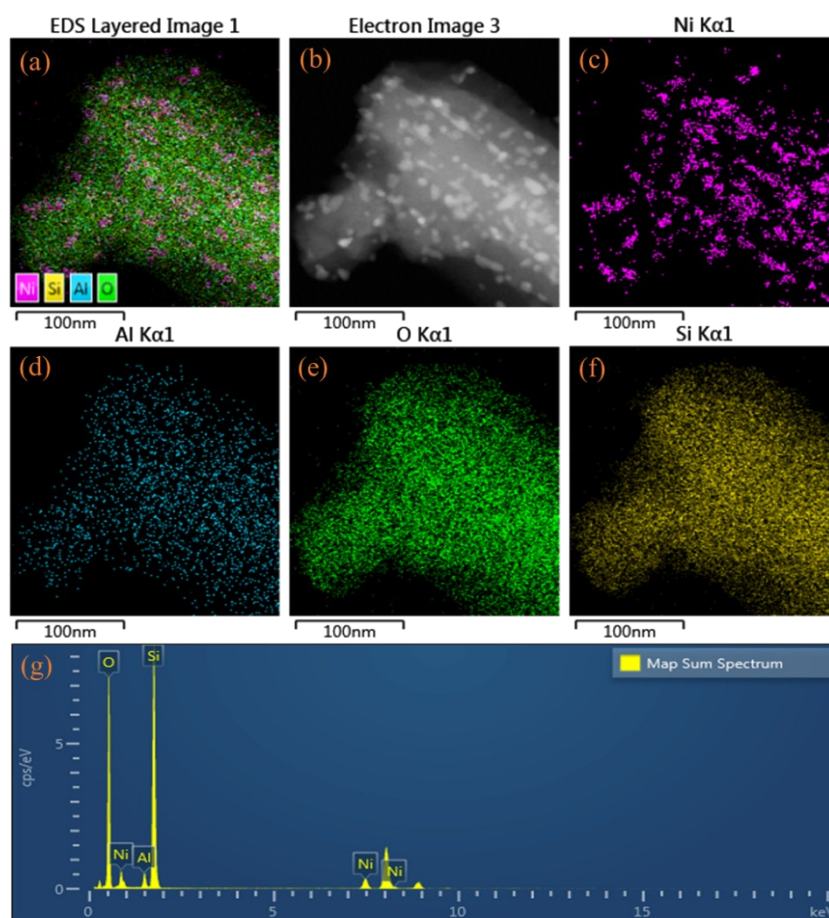

Figure S1. STEM image (a) and its corresponding EDX Ni, Al, O and Si elemental maps (b-g) for the Ni/IM-5-h catalyst.

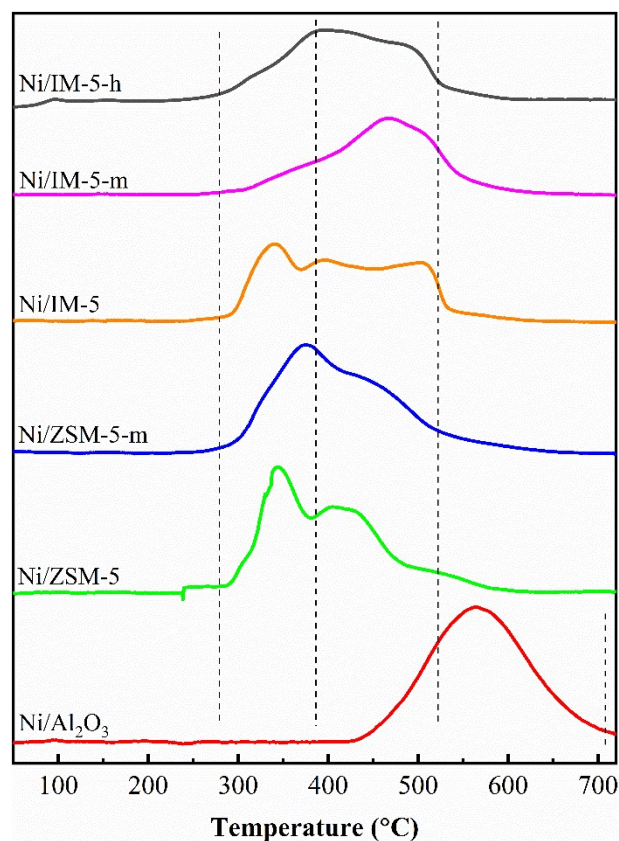

Figure S2. H<sub>2</sub>-TPR curves of calcined catalysts.

Table S2. ICP-MS analysis of the fresh and spent Ni/IM-5-h samples.

| Sample            | Ni content, wt % |
|-------------------|------------------|
| Ni/IM-5-h (fresh) | 4.9              |
| Ni/IM-5-h (spent) | 4.3              |

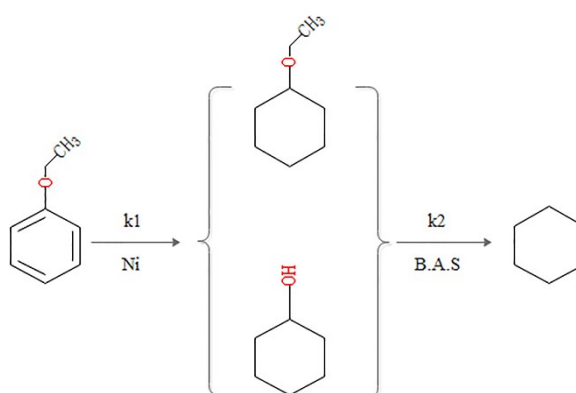

Scheme S1. Simplified reaction mechanism for anisole hydrodeoxygenation.

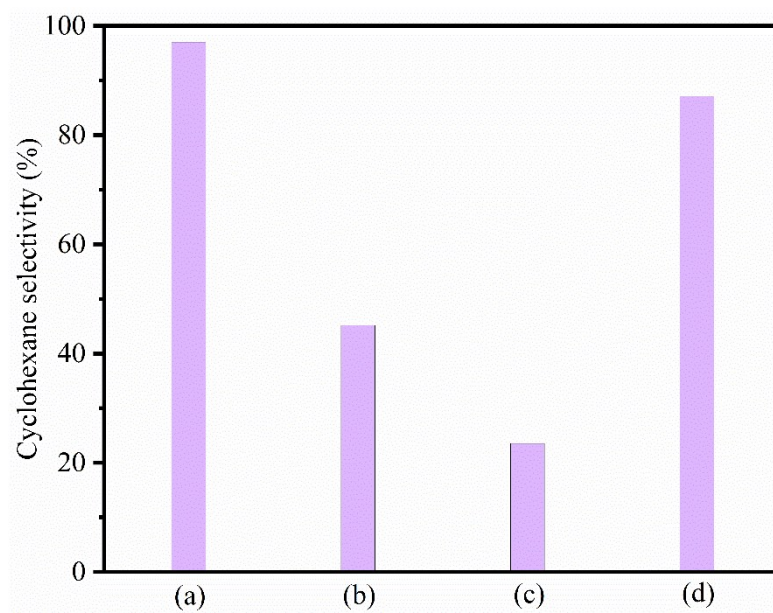

Figure S3. The cyclohexane selectivity over the Ni/IM-5-h catalyst with 1 catalytic cycle (a), 3 cycles (b) and 7 cycles (c), and the spent catalyst after regeneration (d).
